# Supplementary material for: Extracellular vesicles are associated with C-reactive protein in sepsis
Source: PubMed Central journal article supplement (PMC7997920; doi:10.1038/s41598-021-86489-4), 2021-03-26
Supplement: 41598_2021_86489_MOESM1_ESM.pdf [file 41598_2021_86489_MOESM1_ESM.pdf]

## ***Supporting Information***

Extracellular vesicles are associated with C-reactive protein in sepsis

**Birgit Fendl<sup>1</sup>, René Weiss<sup>1</sup>, Tanja Eichhorn<sup>1</sup>, Ingrid Linsberger<sup>1</sup>, Taras Afonyushkin<sup>2</sup>, Florian Puhm<sup>2</sup>, Christoph J. Binder<sup>2</sup>, Michael B. Fischer<sup>3</sup>, Viktoria Weber<sup>1\*</sup>**

<sup>1</sup>Christian Doppler Laboratory for Innovative Therapy Approaches in Sepsis, Department for Biomedical Research, Danube University Krems, Krems, Austria;

<sup>2</sup>Department of Laboratory Medicine, Medical University of Vienna, Vienna, Austria;

<sup>3</sup>Center for Experimental Medicine, Department for Biomedical Research, Danube University Krems, Krems, Austria

\*To whom correspondence should be addressed: Prof. Viktoria Weber, Danube University Krems, Dr.-Karl-Dorrek-Strasse 30, 3500 Krems, Austria; viktoria.weber@donau-uni.ac.at; phone +43 2732 893 2632.

**Content:** Supplementary Figure S1, Supplementary Figure S2, Supplementary Figure S3

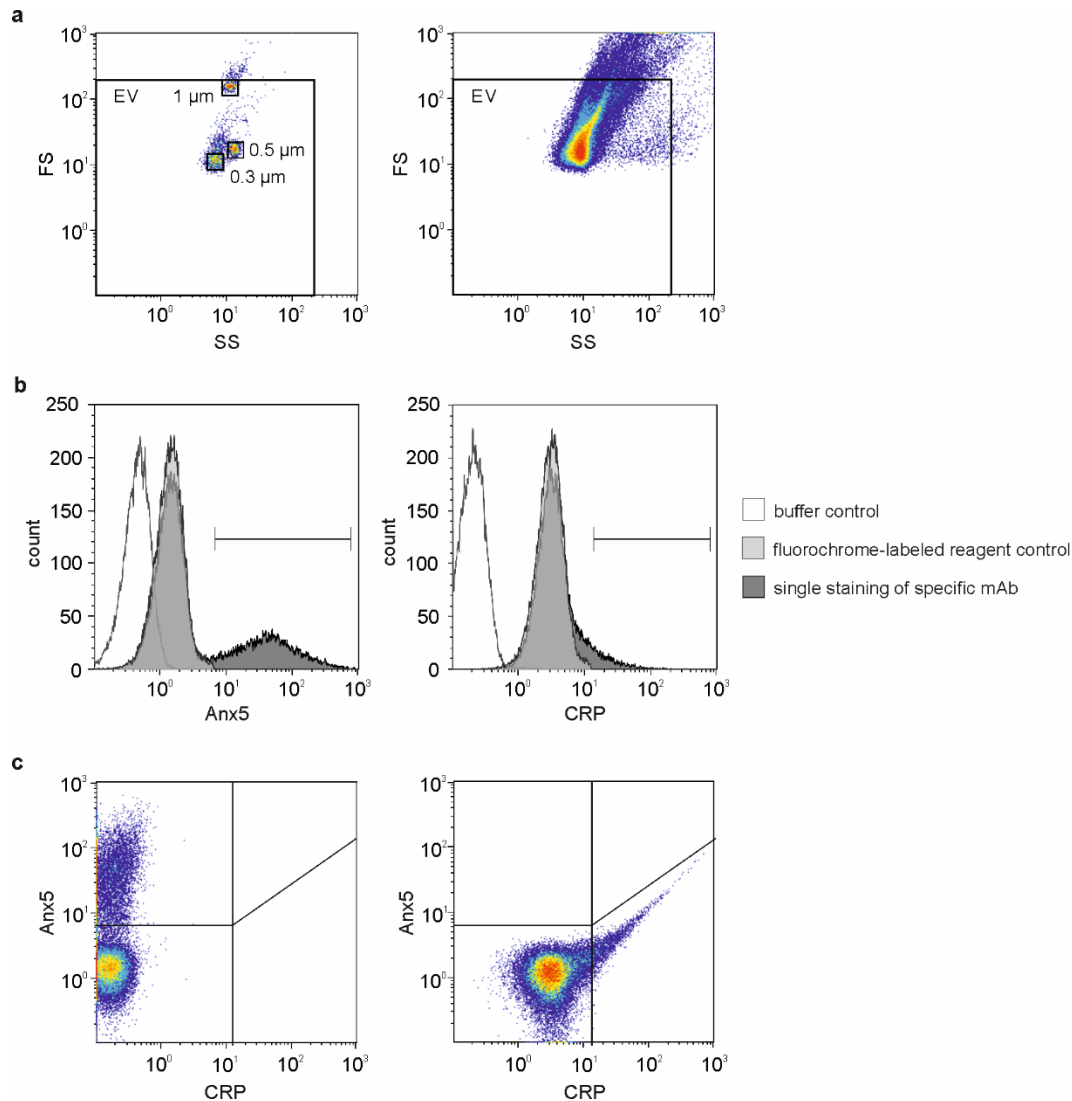

**Supplementary Figure S1. Flow cytometric characterization of EVs: calibration and controls.** (a) The flow cytometer (Gallios, Beckman Coulter, Brea, CA) was calibrated using fluorescent-green silica beads (1 μm, 0.5 μm, 0.3 μm, Kisker Biotech, Steinfurt, Germany) and the EV gate was set at the 1 μm bead cloud as described in the main manuscript (**left**); Representative side scatter (SS) vs. forward scatter (FS) plot of the EV cloud detected in plasma from sepsis patients (**right**). (b) Buffer controls and fluorochrome-labeled reagent controls were used to identify Anx5 positive events (**left**) and CRP positive events (**right**). (c) Single staining of septic plasma sample with Anx5 (**left**) and CRP (**right**).

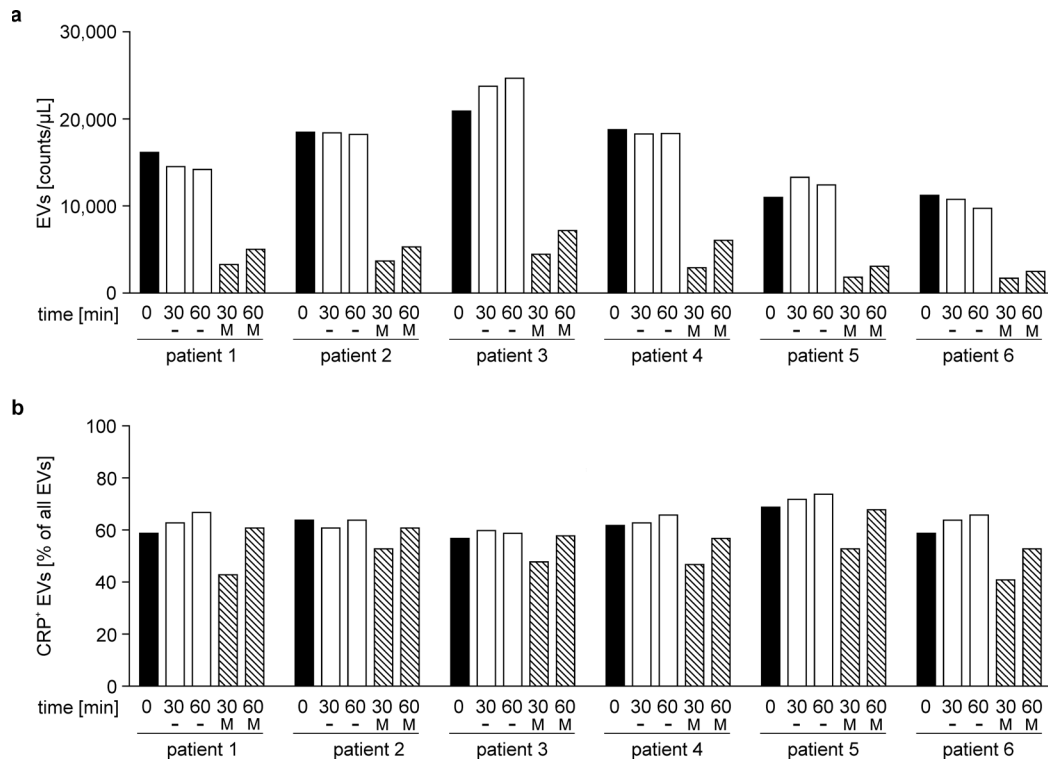

**Supplementary Figure S2. Treatment of plasma from sepsis patients with non-functionalized agarose.** In addition to treatment with PentraSorb (main manuscript, Fig. 2), plasma from sepsis patients (6 patients; n=1 for each patient) was incubated with 10 vol% non-functionalized agarose (adsorbent matrix, M) or left untreated (-) as described in the Methods section. EV counts (**a**), CRP-carrying (CRP<sup>+</sup>) EVs (**b**), as well as plasma CRP were quantified at baseline (0 min), and after 30 and 60 min.

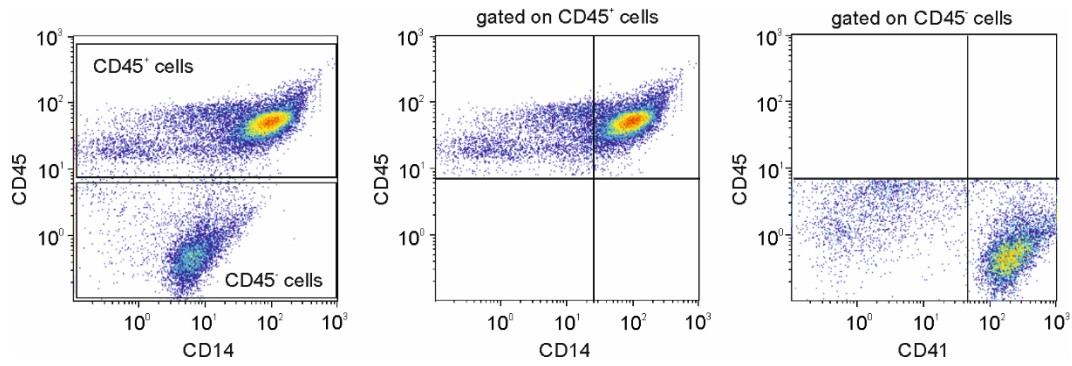

**Supplementary Figure S3. Purity of isolated monocytes.** Monocytes were isolated from peripheral blood mononuclear cells by negative depletion using the Pan Monocyte Isolation Kit as described in the Methods section. Cells were stained with anti-CD14-PE, anti-CD45-PB, as well as anti-CD41-PC7. Monocytes were identified as CD45<sup>+</sup>CD14<sup>+</sup> cells, and their purity was calculated in relation to all leukocytes (CD45<sup>+</sup> cells; **left and middle**). Residual platelets were identified via their expression of CD41 (**right**).
